# Supplementary material for: Early Movement Restriction Affects FNDC5/Irisin and BDNF Levels in Rat Muscle and Brain
Source: MDPI journal article supplement (doi:10.3390/ijms25073918), 2024-03-31
Supplement: s1 [file s1]

**SUPPLEMENTARY TABLE S4. Overview of BDNF level in brain, by sex and group, and P-Value for sex and group effects.**

FNDC5/Irisin or BDNF level determined by western blotting and expressed relative to CTRL-Male. Data are mean  $\pm$  S.E.M. Values were compared with a two-way ANOVA with Tukey post-hoc test.

| BDNF                |     | CTRL male       | CTRL female     | SMR male        | SMR female      | P value<br>(sex effect) | P value<br>(group effect) |
|---------------------|-----|-----------------|-----------------|-----------------|-----------------|-------------------------|---------------------------|
| Prefrontal cortex   | P8  | 1.00 $\pm$ 0.28 | 0.92 $\pm$ 0.25 | 0.57 $\pm$ 0.11 | 0.77 $\pm$ 0.19 | 0.7807                  | 0.1934                    |
|                     | P15 | 1.00 $\pm$ 0.06 | 1.10 $\pm$ 0.28 | 1.12 $\pm$ 0.13 | 1.18 $\pm$ 0.09 | 0.6159                  | 0.5289                    |
|                     | P21 | 1.00 $\pm$ 0.07 | 1.90 $\pm$ 0.14 | 1.13 $\pm$ 0.14 | 0.87 $\pm$ 0.15 | 0.5139                  | 0.7267                    |
|                     | P28 | 1.00 $\pm$ 0.05 | 1.05 $\pm$ 0.09 | 1.00 $\pm$ 0.23 | 0.96 $\pm$ 0.13 | 0.9544                  | 0.7526                    |
| Sensorimotor cortex | P8  | 1.00 $\pm$ 0.25 | 1.06 $\pm$ 0.05 | 1.29 $\pm$ 0.20 | 1.18 $\pm$ 0.10 | 0.8433                  | 0.1978                    |
|                     | P15 | 1.00 $\pm$ 0.25 | 0.95 $\pm$ 0.23 | 0.89 $\pm$ 0.34 | 1.16 $\pm$ 0.39 | 0.7313                  | 0.8720                    |
|                     | P21 | 1.00 $\pm$ 0.13 | 1.29 $\pm$ 0.13 | 1.11 $\pm$ 0.15 | 1.22 $\pm$ 0.18 | 0.1945                  | 0.9131                    |
|                     | P28 | 1.00 $\pm$ 0.27 | 0.96 $\pm$ 0.20 | 1.09 $\pm$ 0.25 | 0.85 $\pm$ 0.16 | 0.5447                  | 0.9516                    |
| Hippocampus         | P8  | 1.00 $\pm$ 0.24 | 0.97 $\pm$ 0.29 | 1.65 $\pm$ 0.27 | 1.56 $\pm$ 0.36 | 0.8442                  | 0.0512                    |
|                     | P15 | 1.00 $\pm$ 0.13 | 1.05 $\pm$ 0.07 | 1.13 $\pm$ 0.24 | 0.97 $\pm$ 0.09 | 0.7091                  | 0.8748                    |
|                     | P21 | 1.00 $\pm$ 0.16 | 0.94 $\pm$ 0.08 | 0.91 $\pm$ 0.20 | 1.08 $\pm$ 0.40 | 0.8356                  | 0.9248                    |
|                     | P28 | 1.00 $\pm$ 0.11 | 0.75 $\pm$ 0.04 | 0.77 $\pm$ 0.16 | 0.74 $\pm$ 0.07 | 0.1888                  | 0.2854                    |
| Striatum            | P8  | 1.00 $\pm$ 0.21 | 0.84 $\pm$ 0.23 | 0.76 $\pm$ 0.14 | 0.83 $\pm$ 0.11 | 0.7981                  | 0.5200                    |
|                     | P15 | 1.00 $\pm$ 0.13 | 1.00 $\pm$ 0.10 | 1.26 $\pm$ 0.14 | 1.12 $\pm$ 0.10 | 0.5602                  | 0.1179                    |
|                     | P21 | 1.00 $\pm$ 0.04 | 0.83 $\pm$ 0.11 | 1.14 $\pm$ 0.14 | 0.81 $\pm$ 0.12 | 0.0625                  | 0.6429                    |
|                     | P28 | 1.00 $\pm$ 0.05 | 0.84 $\pm$ 0.06 | 1.12 $\pm$ 0.11 | 0.97 $\pm$ 0.14 | 0.1417                  | 0.2451                    |
