# Supplementary material for: Early Movement Restriction Affects FNDC5/Irisin and BDNF Levels in Rat Muscle and Brain
Source: MDPI journal article supplement (doi:10.3390/ijms25073918), 2024-03-31
Supplement: s1 [file s1]

**SUPPLEMENTARY TABLE S3. Overview of FNDC5/irisine level in brain, by sex and group, and P-Value for sex and group effects.**  
 FNDC5/Irisin or BDNF level determined by western blotting and expressed relative to CTRL-Male. Data are mean  $\pm$  S.E.M. Values were compared with a two-way ANOVA with Tukey post-hoc test. \* : difference vs males of the same group; # : difference vs Ctrl of the same sex.

| FNCD5/irisin        |     | CTRL male       | CTRL female       | SMR male        | SMR female          | P value<br>(sex effect) | P value<br>(group effect) |
|---------------------|-----|-----------------|-------------------|-----------------|---------------------|-------------------------|---------------------------|
| Prefrontal cortex   | P8  | 1.00 $\pm$ 0.07 | 0.97 $\pm$ 0.12   | 1.10 $\pm$ 0.13 | 0.86 $\pm$ 0.10     | 0.2217                  | 0.9374                    |
|                     | P15 | 1.00 $\pm$ 0.18 | 1.24 $\pm$ 0.03   | 1.41 $\pm$ 0.23 | 1.82 $\pm$ 0.20     | 0.1084                  | <b>0.0218</b>             |
|                     | P21 | 1.00 $\pm$ 0.34 | 1.00 $\pm$ 0.19   | 0.96 $\pm$ 0.15 | 0.88 $\pm$ 0.10     | 0.8503                  | 0.6859                    |
|                     | P28 | 1.00 $\pm$ 0.08 | 1.10 $\pm$ 0.15   | 0.72 $\pm$ 0.07 | 0.87 $\pm$ 0.08     | 0.2725                  | <b>0.0308</b>             |
| Sensorimotor cortex | P8  | 1.00 $\pm$ 0.22 | 0.91 $\pm$ 0.12   | 0.91 $\pm$ 0.03 | 1.10 $\pm$ 0.06     | 0.7064                  | 0.7096                    |
|                     | P15 | 1.00 $\pm$ 0.19 | 1.29 $\pm$ 0.18   | 1.27 $\pm$ 0.22 | 2.00 $\pm$ 0.29     | <b>0.0423</b>           | <b>0.0481</b>             |
|                     | P21 | 1.00 $\pm$ 0.05 | 1.81 $\pm$ 0.32   | 1.42 $\pm$ 0.11 | 2.13 $\pm$ 0.38     | <b>0.0090</b>           | 0.1630                    |
|                     | P28 | 1.00 $\pm$ 0.14 | 0.81 $\pm$ 0.13   | 1.00 $\pm$ 0.10 | 0.87 $\pm$ 0.12     | 0.2253                  | 0.8031                    |
| Hippocampus         | P8  | 1.00 $\pm$ 0.12 | 0.95 $\pm$ 0.07   | 1.15 $\pm$ 0.06 | 0.84 $\pm$ 0.09     | 0.0663                  | 0.7927                    |
|                     | P15 | 1.00 $\pm$ 0.11 | 0.85 $\pm$ 0.13   | 1.65 $\pm$ 0.26 | 1.40 $\pm$ 0.19     | 0.3110                  | <b>0.0065</b>             |
|                     | P21 | 1.00 $\pm$ 0.10 | 0.89 $\pm$ 0.08   | 1.31 $\pm$ 0.22 | 1.28 $\pm$ 0.15     | 0.6579                  | <b>0.0409</b>             |
|                     | P28 | 1.00 $\pm$ 0.09 | 1.09 $\pm$ 0.14   | 0.98 $\pm$ 0.12 | 1.31 $\pm$ 0.08     | 0.0769                  | 0.3856                    |
| Striatum            | P8  | 1.00 $\pm$ 0.12 | 0.81 $\pm$ 0.09   | 0.84 $\pm$ 0.05 | 0.82 $\pm$ 0.11     | 0.3119                  | 0.4788                    |
|                     | P15 | 1.00 $\pm$ 0.05 | 0.92 $\pm$ 0.04   | 1.06 $\pm$ 0.05 | 1.32 $\pm$ 0.06 *,# | 0.0982                  | <b>0.0006</b>             |
|                     | P21 | 1.00 $\pm$ 0.11 | 0.58 $\pm$ 0.07 * | 0.93 $\pm$ 0.10 | 0.72 $\pm$ 0.11     | <b>0.0059</b>           | 0.7367                    |
|                     | P28 | 1.00 $\pm$ 0.12 | 0.88 $\pm$ 0.16   | 0.89 $\pm$ 0.15 | 1.04 $\pm$ 0.09     | 0.9360                  | 0.8577                    |
