# Supplementary material for: Early Movement Restriction Affects FNDC5/Irisin and BDNF Levels in Rat Muscle and Brain
Source: MDPI journal article supplement (doi:10.3390/ijms25073918), 2024-03-31
Supplement: s1 [file s1]

**SUPPLEMENTARY TABLE S2. Overview of FNDC5/irisin level in muscle, by sex and group, and P-Value for sex and group effects.** FNDC5/Irisin level determined by western blotting and expressed relative to CTRL-Male. Data are mean  $\pm$  S.E.M. Values were compared with a two-way ANOVA with Tukey post-hoc test. \* : difference vs males of the same group.

| FNDC5/irisin |     | CTRL male       | CTRL female     | SMR male        | SMR female        | P value<br>(sex effect) | P value<br>(group effect) |
|--------------|-----|-----------------|-----------------|-----------------|-------------------|-------------------------|---------------------------|
| SOL          | P8  | 1.00 $\pm$ 0.27 | 2.04 $\pm$ 0.49 | 2.34 $\pm$ 0.89 | 0.90 $\pm$ 0.35   | 0.7541                  | 0.8763                    |
|              | P15 | 1.00 $\pm$ 0.50 | 0.50 $\pm$ 0.27 | 4.79 $\pm$ 2.25 | 2.30 $\pm$ 1.10   | 0.3057                  | 0.0696                    |
|              | P21 | 1.00 $\pm$ 0.16 | 1.08 $\pm$ 0.29 | 2.80 $\pm$ 0.67 | 2.34 $\pm$ 0.42   | 0.6910                  | <b>0.0067</b>             |
|              | P28 | 1.00 $\pm$ 0.41 | 0.72 $\pm$ 0.12 | 1.69 $\pm$ 0.50 | 2.38 $\pm$ 0.54   | 0.6392                  | <b>0.0135</b>             |
| EDL          | P8  | 1.00 $\pm$ 0.15 | 0.68 $\pm$ 0.06 | 1.70 $\pm$ 0.28 | 0.96 $\pm$ 0.18   | <b>0.0135</b>           | <b>0.0213</b>             |
|              | P15 | 1.00 $\pm$ 0.07 | 0.90 $\pm$ 0.11 | 0.84 $\pm$ 0.14 | 1.21 $\pm$ 0.15   | 0.2956                  | 0.5526                    |
|              | P21 | 1.00 $\pm$ 0.08 | 0.59 $\pm$ 0.13 | 0.93 $\pm$ 0.20 | 0.35 $\pm$ 0.07 * | <b>0.0028</b>           | 0.2700                    |
|              | P28 | 1.00 $\pm$ 0.07 | 1.11 $\pm$ 0.32 | 1.12 $\pm$ 0.36 | 1.26 $\pm$ 0.24   | 0.6701                  | 0.6456                    |
| TA           | P8  | 1.00 $\pm$ 0.40 | 0.90 $\pm$ 0.23 | 0.95 $\pm$ 0.41 | 0.92 $\pm$ 0.20   | 0.8406                  | 0.9570                    |
|              | P15 | 1.00 $\pm$ 0.09 | 1.53 $\pm$ 0.22 | 1.21 $\pm$ 0.18 | 1.61 $\pm$ 0.17   | <b>0.0192</b>           | 0.4189                    |
|              | P21 | 1.00 $\pm$ 0.13 | 2.25 $\pm$ 0.44 | 1.14 $\pm$ 0.42 | 1.32 $\pm$ 0.49   | 0.0968                  | 0.3391                    |
|              | P28 | 1.00 $\pm$ 0.27 | 1.46 $\pm$ 0.33 | 0.99 $\pm$ 0.23 | 1.33 $\pm$ 0.24   | 0.1597                  | 0.7978                    |
