# Supplementary material for: Early Movement Restriction Affects FNDC5/Irisin and BDNF Levels in Rat Muscle and Brain
Source: MDPI journal article supplement (doi:10.3390/ijms25073918), 2024-03-31
Supplement: s1 [file s1]

**SUPPLEMENTARY TABLE S1. Overview of hindlimb muscle weight, by sex and group, and P-Value for sex and group effects.**

Muscle Weight Wet/Body Weight ratio for SOL, EDL and Tibialis anterior muscles at P8, P15, P21 and P28.

Data are mean  $\pm$  S.E.M. Values were compared with a two-way ANOVA with Tukey post-hoc test.

<sup>#</sup>p<0.05, <sup>###</sup>p<0.001 vs. CTRL of the same sex.

|     |     | CTRL male       | CTRL female     | SMR male                       | SMR female                     | P value<br>(sex effect) | P value<br>(group effect) |
|-----|-----|-----------------|-----------------|--------------------------------|--------------------------------|-------------------------|---------------------------|
| SOL | P8  | 0.22 $\pm$ 0.01 | 0.19 $\pm$ 0.01 | 0.13 $\pm$ 0.01 <sup>###</sup> | 0.17 $\pm$ 0.01                | 0,7095                  | <b>0,0001</b>             |
|     | P15 | 0.31 $\pm$ 0.02 | 0.31 $\pm$ 0.03 | 0.21 $\pm$ 0.02 <sup>#</sup>   | 0.21 $\pm$ 0.02 <sup>#</sup>   | 0,8772                  | <b>&lt;0,0001</b>         |
|     | P21 | 0.40 $\pm$ 0.02 | 0.43 $\pm$ 0.02 | 0.25 $\pm$ 0.02 <sup>###</sup> | 0.27 $\pm$ 0.01 <sup>###</sup> | 0,1716                  | <b>&lt;0,0001</b>         |
|     | P28 | 0.43 $\pm$ 0.02 | 0.46 $\pm$ 0.03 | 0.26 $\pm$ 0.01 <sup>###</sup> | 0.28 $\pm$ 0.02 <sup>###</sup> | 0,2336                  | <b>&lt;0,0001</b>         |
| EDL | P8  | 0.27 $\pm$ 0.01 | 0.26 $\pm$ 0.01 | 0.27 $\pm$ 0.01                | 0.26 $\pm$ 0.01                | 0,2642                  | 0,9807                    |
|     | P15 | 0.33 $\pm$ 0.01 | 0.33 $\pm$ 0.02 | 0.35 $\pm$ 0.02                | 0.33 $\pm$ 0.02                | 0,6885                  | 0,7463                    |
|     | P21 | 0.45 $\pm$ 0.02 | 0.45 $\pm$ 0.01 | 0.33 $\pm$ 0.02 <sup>###</sup> | 0.37 $\pm$ 0.01 <sup>###</sup> | 0,1081                  | <b>&lt;0,0001</b>         |
|     | P28 | 0.49 $\pm$ 0.01 | 0.50 $\pm$ 0.01 | 0.47 $\pm$ 0.02                | 0.45 $\pm$ 0.01                | 0,7755                  | <b>0,0221</b>             |
| TA  | P8  | 0.90 $\pm$ 0.02 | 0.88 $\pm$ 0.02 | 0.94 $\pm$ 0.03                | 0.97 $\pm$ 0.04                | 0,8953                  | <b>0,0207</b>             |
|     | P15 | 1.21 $\pm$ 0.03 | 1.19 $\pm$ 0.04 | 1.19 $\pm$ 0.03                | 1.12 $\pm$ 0.05                | 0,6746                  | <b>0,0427</b>             |
|     | P21 | 1.50 $\pm$ 0.04 | 1.53 $\pm$ 0.02 | 1.31 $\pm$ 0.04                | 1.36 $\pm$ 0.12                | 0,4954                  | <b>&lt;0,0001</b>         |
|     | P28 | 1.82 $\pm$ 0.03 | 1.89 $\pm$ 0.04 | 1.62 $\pm$ 0.07 <sup>#</sup>   | 1.61 $\pm$ 0.03 <sup>###</sup> | 0,7427                  | <b>&lt;0,0001</b>         |
